# Supplementary material for: Sequencing and Characterization of αs2-Casein Gene (CSN1S2) in the Old-World Camels Have Proven Genetic Variations Useful for the Understanding of Species Diversification
Source: MDPI journal article supplement (doi:10.3390/ani13172805), 2023-09-04
Supplement: s1 [file s1]

| <b>Amplicon</b> | <b>Primers</b>                                          | <b>Sequence</b>                                                    | <b>Tm °C</b> | <b>Size (bp)</b> |
|-----------------|---------------------------------------------------------|--------------------------------------------------------------------|--------------|------------------|
| 1               | <i>Cf CSN1S2 Prom F4</i><br><i>Cf CSN12 Ex 1 R</i>      | 5'-ATAACTGTCAGTGATTTCTC-3'<br>5'- TGAAGGGAAGACAAGTA-3'             | 53.6         | 791              |
| 2               | <i>Cd CSN1S2 Prom F</i><br><i>Cd CSN1S2 Int 1 R</i>     | 5'- CACACAAACACAAACTATAAATAA-3'<br>5'- ACATAATGTAAAATCTTGGTTTC-3'  | 54.1         | 925              |
| 3               | <i>Cd CSN1S2 Int 1 F</i><br><i>Cd CSN1S2 Int 3 R1</i>   | 5'- TTTCATTACTGTATCTTCACG-3'<br>5'- AATTTTCTCTGACTCTGTAC-3'        | 53.9         | 1194             |
| 4               | <i>Cd CSN1S2 Int 2 F</i><br><i>Cd CSN1S2 Ex 4 R</i>     | 5'- AAACAGAATTCTAAAAGCCC-3'<br>5'- CTGAGAGACGTTGATAGATT-3'         | 55.3         | 995              |
| 5               | <i>Cd CSN1S2 Int 3 F</i><br><i>Cd CSN1S2 Int 6 R</i>    | 5'- ATATTTTTCCTCTCTTCTCTG-3'<br>5'- AGAATCTGGGAATCAAATATAT-3'      | 54.7         | 1033             |
| 6               | <i>Cd CSN1S2 Ex 6 F</i><br><i>Cd CSN1S2 Int 7 R</i>     | 5'- GACATCTGCTCCACATTT-3'<br>5'- TATATAATCAAAATCTGGTGA-3'          | 53.4         | 1340             |
| 7               | <i>Cd CSN1S2 Int 7 F1</i><br><i>Cd CSN1S2 Ex 8 R</i>    | 5'- CCTGGTTACATTGCTTTTAT- 3'<br>5'- ACTTCAGCTGATTCCTTA-3'          | 54.3         | 1166             |
| 8               | <i>Cd CSN1S2 Int 7 F</i><br><i>Cd CSN1S2 Int 8 R1</i>   | 5'-CTGTAAGGAACATAAAGGAAG -3'<br>5'- CAGAACCAAATTACTTAGACCT-3'      | 57.7         | 1897             |
| 9               | <i>Cd CSN1S2 Int 8 F</i><br><i>Cd CSN1S2 Int 10 R</i>   | 5'- TTAAAGGTCTAAGTAATTTGGT-3'<br>5'- TTATTGCTTACAAAAGTAGATC-3'     | 53.8         | 869              |
| 10              | <i>Cd CSN1S2 Ex 10 F</i><br><i>Cd CSN1S2 Int 12 R</i>   | 5'- ATACAGAACACAGAGCAG-3'<br>5'- TAGTATGAGAGATGAAAAAGAA-3'         | 54.8         | 1587             |
| 11              | <i>Cd CSN1S2 Ex 12 F</i><br><i>Cd CSN1S2 Ex 14 R</i>    | 5'- GGAAAATTCAAAAAAGACTGTT-3'<br>5'- TTCTTCAGTCAATTCAGTTTTC-3'     | 53.9         | 1490             |
| 12              | <i>Cd CSN1S2 Ex 12 F</i><br><i>Cd CSN1S2 Ex 15 R</i>    | 5'- GGAAAATTCAAAAAAGACTGTT-3'<br>5'- AGAGGAATGTCTGATAATAT-3'       | 52.6         | 2405             |
| 13              | <i>Cd CSN1S2 Ex 15 F</i><br><i>Cd CSN1S2 Ex 16 R</i>    | 5'- ATCTCAAGACTGTTTATCAATA-3'<br>5'- CATAATCAAGTAGAAGCAGT-3'       | 54.1         | 885              |
| 14              | <i>Cd CSN1S2 Int 15 F</i><br><i>Cd CSN1S2 Int 16 R1</i> | 5'- AGCTTTTGATTTTGACAAAGTCACTT-3'<br>5'- GCATACCAAAGTAATATTTATA-3' | 56.05        | 2057             |
| 15              | <i>Cd CSN1S2 Int 16 F</i><br><i>Cd CSN1S2 3-End R</i>   | 5'- GGATAATTAAATGTTTCCTTCAAAA-3'<br>5'- GTGAGAAGTAAAAGTGAAGT-3'    | 54.3         | 767              |

**Table S1.** Amplicons, sequences and annealing temperatures of the primers used for the characterization of *CSN1S2* gene in the Old World camels (*C. bactrianus* and *C. dromedarius*).
