# Supplementary material for: Sequencing and Characterization of αs2-Casein Gene (CSN1S2) in the Old-World Camels Have Proven Genetic Variations Useful for the Understanding of Species Diversification
Source: MDPI journal article supplement (doi:10.3390/ani13172805), 2023-09-04
Supplement: s1 [file s1]

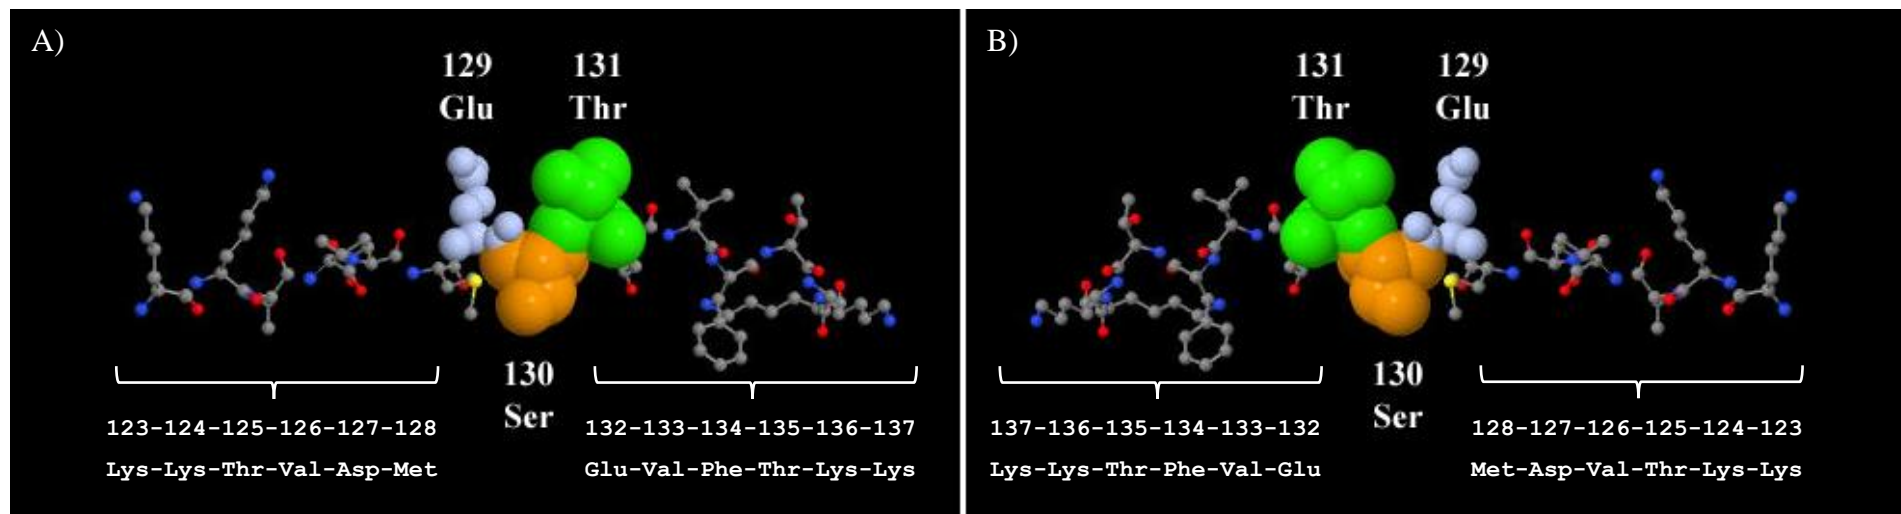

**Figure S1.** The 3D representation of the amino acids 123-137 of  $\alpha_2$ -casein is shown in both the normal primary frame (A) and the opposite frame (B), providing the right orientation (Thr-X-Glu) for the casein kinase to perform phosphorylation.
