# Supplementary material for: Sequencing and Characterization of αs2-Casein Gene (CSN1S2) in the Old-World Camels Have Proven Genetic Variations Useful for the Understanding of Species Diversification
Source: MDPI journal article supplement (doi:10.3390/ani13172805), 2023-09-04
Supplement: s1 [file s1]

| Position     | Nucleotide | Bactrian<br>present study<br>(OQ730238) | Nucleotide | Dromedary<br>present study<br>(OQ730239) |
|--------------|------------|-----------------------------------------|------------|------------------------------------------|
| Promoter     | 37         | T                                       | 37         | C                                        |
|              | 127        | T                                       | 127        | G                                        |
| Intron 1     | 1339       | T                                       | 1339       | A                                        |
|              | 1628       | C                                       | 1628       | T                                        |
| Intron 2     | 1766       | C                                       | 1766       | A                                        |
|              | 1862       | C                                       | 1862       | T                                        |
|              | 2134       | G                                       | 2134       | C                                        |
| Intron 3     | 2393       | A                                       | 2401       | G                                        |
|              | 2530       | C                                       | 2538       | T                                        |
| Intron 5     | 3510       | T                                       | 3519       | C                                        |
| Intron 6     | 3853       | T                                       | 3862       | C                                        |
|              | 4120       | C                                       | 4129       | T                                        |
|              | 4447       | T                                       | 4456       | C                                        |
| Intron 7     | 5166       | G                                       | 5175       | C                                        |
|              | 5773       | G                                       | 5782       | A                                        |
| Intron 8     | 6644       | T                                       | 6653       | C                                        |
|              | 7039       | A                                       | 7048       | C                                        |
|              | 7211       | C                                       | 7249       | T                                        |
| Intron 9     | 8092       | G                                       | 8130       | T                                        |
| Intron 10    | 8916       | T                                       | 8952       | G                                        |
| Intron 12    | 10165      | T                                       | 10201      | A                                        |
|              | 10552      | G                                       | 10588      | A                                        |
| Intron 14    | 11364      | G                                       | 11403      | A                                        |
|              | 11660      | C                                       | 11699      | A                                        |
| Intron 16    | 13140      | G                                       | 13179      | A                                        |
|              | 13990      | A                                       | 14029      | C                                        |
|              | 14350      | C                                       | 14389      | A                                        |
|              | 14681      | G                                       | 14722      | A                                        |
| <b>Total</b> |            | <b>28</b>                               |            | <b>28</b>                                |

**Table S2.** Inter-species polymorphisms detected by sequencing the *CSNIS2* gene in *C. bactrianus* and *C. dromedarius*.
